# Supplementary material for: Genotypic and Epidemiologic Profiles of Giardia duodenalis in Four Brazilian Biogeographic Regions
Source: MDPI journal article supplement (doi:10.3390/microorganisms10050940), 2022-04-30
Supplement: s1 [file s1]

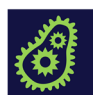

# Supplementary Materials

**Table S1.** *Giardia duodenalis* reference strains used in this study.

| Accession Number | Isolate         | Assemblage / Genotype | Host       | Country             | Content       | Year | Reference |
|------------------|-----------------|-----------------------|------------|---------------------|---------------|------|-----------|
| EU769206         | Swecat171       | A                     | cat        | Sweden              | Europe        | 2011 | [1]       |
| EU621373         | JC002           | A                     | deer       | Poland              | Europe        | 2008 | [2]       |
| EU769205         | Swecat078       | A                     | cat        | Sweden              | Europe        | 2008 | [1]       |
| GU396696         | H3-001          | A                     | human      | Poland              | Europe        | 2016 | [3]       |
| HM165227         | Sweh040         | A                     | human      | Sweden              | Europe        | 2016 | [4]       |
| KF922979         | HC11            | A                     | human      | Brazil <sup>a</sup> | South America | 2014 | [5]       |
| KF922983         | HC29            | A                     | human      | Brazil <sup>a</sup> | South America | 2014 | [5]       |
| KF922992         | HC44            | A                     | human      | Brazil <sup>a</sup> | South America | 2014 | [5]       |
| KF923000         | DC01            | A                     | dog        | Brazil <sup>a</sup> | South America | 2014 | [5]       |
| KM190682         | VANC/85/UBC/2   | A                     | human      | Canada              | North America | 1985 | [6]       |
| KY612245         | AN1.5           | A                     | human      | Brazil <sup>b</sup> | South America | 2014 | [7]       |
| MN629930         | Z1              | A                     | dog        | Iraq                | Asia          | 2020 | [8]       |
| XM001705373      | WB C6           | A                     | culture    | USA                 | North America | 2007 | [9]       |
| GQ329671         | Sweh166         | A                     | human      | Sweden              | Europe        | 2011 | [4]       |
| EU014384         | Be2             | A1                    | beaver     | Canada              | North America | 2011 | [10]      |
| HQ179591         | 46c2            | A2                    | human      | Australia           | Oceania       | 2011 | [11]      |
| AY072724         | ISSGF7          | A3                    | human      | Italy               | Europe        | 2002 | [12]      |
| DQ090542         | STS-U           | A3                    | human      | Norway              | Europe        | 2004 | [13]      |
| DQ116612         | CBHRG9          | A3                    | wastewater | Mexico              | North America | 2006 | [14]      |
| EU014381         | AB              | A3                    | human      | Peru                | South America | 1985 | [15]      |
| FJ560577         | Lim2            | A3                    | human      | France              | Europe        | 1998 | [16]      |
| FJ971408         | GLT1            | A3                    | human      | Thailand            | Asia          | 2007 | [17]      |
| FN386484         | I231104         | A3                    | wastewater | Spain               | Europe        | 2004 | [18]      |
| KU504738         | S42             | A3                    | human      | Brazil <sup>c</sup> | South America | 2011 | [19]      |
| DQ090523         | BG-Ber2         | B                     | human      | Norway              | Europe        | 2005 | [13]      |
| AB480877         | PalH9           | B                     | human      | Palestine           | Asia          | 2006 | [20]      |
| AB618785         | GH-202          | B                     | human      | Japan               | Asia          | 2010 | [21]      |
| FJ971440         | GLT2            | B                     | human      | Thailand            | Asia          | 2007 | [17]      |
| FJ971461         | GL518           | B                     | human      | Thailand            | Asia          | 2010 | [17]      |
| FJ971482         | GL121           | B                     | human      | Thailand            | Asia          | 2007 | [17]      |
| KF922985         | HC32            | B                     | human      | Brazil <sup>a</sup> | South America | 2014 | [5]       |
| KF922993         | HC45            | B                     | human      | Brazil <sup>a</sup> | South America | 2014 | [5]       |
| KP687755         | VANC/90/UBC/44  | B                     | wastewater | Canada              | North America | 1990 | [6]       |
| KP687756         | "VANC/90/UBC/54 | B                     | beaver     | Canada              | North America | 1990 | [6]       |
| KU504702         | S3C1            | B                     | human      | Brazil <sup>c</sup> | South America | 2011 | [19]      |
| KU504704         | S3C3            | B                     | human      | Brazil <sup>c</sup> | South America | 2011 | [19]      |
| KU504707         | S8              | B                     | human      | Brazil <sup>c</sup> | South America | 2011 | [19]      |
| KU504708         | S9              | B                     | human      | Brazil <sup>c</sup> | South America | 2011 | [19]      |
| KU504709         | S10C3           | B                     | human      | Brazil <sup>c</sup> | South America | 2011 | [19]      |
| KU504712         | S11C1           | B                     | human      | Brazil <sup>c</sup> | South America | 2011 | [19]      |
| KU504713         | S11C2           | B                     | human      | Brazil <sup>c</sup> | South America | 2011 | [19]      |
| KU504714         | S11C3           | B                     | human      | Brazil <sup>c</sup> | South America | 2011 | [19]      |
| KU504715         | S13C2           | B                     | human      | Brazil <sup>c</sup> | South America | 2011 | [19]      |
| KU504720         | S15             | B                     | human      | Brazil <sup>c</sup> | South America | 2011 | [19]      |
| KU504722         | S16C2           | B                     | human      | Brazil <sup>c</sup> | South America | 2011 | [19]      |
| KU504723         | S16C4           | B                     | human      | Brazil <sup>c</sup> | South America | 2011 | [19]      |
| KU504731         | S24C2           | B                     | human      | Brazil <sup>c</sup> | South America | 2011 | [19]      |
| KU504732         | S24C3           | B                     | human      | Brazil <sup>c</sup> | South America | 2011 | [19]      |
| KY612242         | S8C5            | B                     | human      | Brazil <sup>c</sup> | South America | 2011 | [19]      |
| LC508615         | K6 clone1       | B                     | human      | Kenya               | Africa        | 2013 | [22]      |
| MT542771         | 5               | B                     | human      | Brazil <sup>c</sup> | South America | 2021 | [23]      |
| AY072725         | Nij5            | B1                    | human      | The Netherlands     | Europe        | 2002 | [24]      |
| AY072726         | LD18            | B2                    | human      | Belgium             | Europe        | 2002 | [24]      |
| AY072727         | BAH8            | B3                    | human      | Australia           | Oceania       | 1999 | [12]      |
| JF422719         | BRA dogD15      | C                     | dog        | Brazil <sup>a</sup> | South America | 2009 | [25]      |

|          |       |   |     |                     |               |      |      |
|----------|-------|---|-----|---------------------|---------------|------|------|
| KF923019 | VET01 | D | dog | Brazil <sup>a</sup> | South America | 2014 | [5]  |
| AY072729 | P15   | E | pig | Czech Republic      | Europe        | 1996 | [12] |
| AY647264 | A101  | F | cat | Italy               | Europe        | 2004 | [26] |

<sup>a</sup> Atlantic Forest biome; <sup>b</sup> Cerrado biome; <sup>c</sup> Amazon biome.

**Table S2.** Molecular diversity indexes of *Giardia duodenalis* based on  $\beta$ -giardin locus (592 bp, n=106).

| Assemblage   | Region (N)                        | Statistics        |                       |                            |                          |                        |                          |
|--------------|-----------------------------------|-------------------|-----------------------|----------------------------|--------------------------|------------------------|--------------------------|
|              |                                   | H $\pm$ SD        | N° of haplo-<br>types | N° of polymorphic<br>sites | N° of substitu-<br>tions | N° of transi-<br>tions | N° of transver-<br>sions |
| Assemblage A | South America (31)                | 0.879 $\pm$ 0.037 | 14                    | 38                         | 39                       | 21                     | 18                       |
|              | North America (4)                 | 0.666 $\pm$ 0.204 | 2                     | 4                          | 4                        | 4                      | 0                        |
|              | Europe (10)                       | 0.822 $\pm$ 0.096 | 5                     | 15                         | 15                       | 15                     | 0                        |
|              | Asia (2)                          | 1.000 $\pm$ 0.500 | 2                     | 4                          | 4                        | 4                      | 0                        |
|              | All continents (49)               | 0.854 $\pm$ 0.029 | 16                    | 50                         | 50                       | 33                     | 18                       |
|              | All Amazon biome (5)              | 0.800 $\pm$ 0.164 | 3                     | 8                          | 8                        | 6                      | 2                        |
|              | <b>Amazon biome* (4)</b>          | 0.833 $\pm$ 0.222 | 3                     | 8                          | 8                        | 6                      | 2                        |
|              | All Cerrado biome (8)             | 0.964 $\pm$ 0.077 | 7                     | 30                         | 31                       | 15                     | 16                       |
|              | <b>Cerrado biome* (7)</b>         | 1.000 $\pm$ 0.076 | 7                     | 30                         | 31                       | 15                     | 16                       |
|              | <b>Caatinga biome* (5)</b>        | 0.700 $\pm$ 0.218 | 3                     | 2                          | 2                        | 2                      | 0                        |
|              | All Atlantic Forest biome (13)    | 0.859 $\pm$ 0.063 | 6                     | 6                          | 6                        | 6                      | 0                        |
|              | <b>Atlantic Forest biome* (9)</b> | 0.750 $\pm$ 0.112 | 4                     | 4                          | 4                        | 4                      | 0                        |
|              | Atlantic Forest biome (4)         | 0.833 $\pm$ 0.222 | 3                     | 2                          | 2                        | 2                      | 0                        |
|              | All Brazil (31)                   | 0.879 $\pm$ 0.037 | 14                    | 38                         | 39                       | 21                     | 18                       |
| Assemblage B | South America (41)                | 0.918 $\pm$ 0.033 | 23                    | 36                         | 36                       | 31                     | 6                        |
|              | North America (2)                 | 1.000 $\pm$ 0.500 | 2                     | 3                          | 3                        | 3                      | 0                        |
|              | Europe (3)                        | 1.000 $\pm$ 0.272 | 3                     | 7                          | 7                        | 7                      | 0                        |
|              | Asia (5)                          | 1.000 $\pm$ 0.126 | 5                     | 5                          | 5                        | 5                      | 0                        |
|              | All continents (51)               | 0.921 $\pm$ 0.028 | 28                    | 37                         | 37                       | 32                     | 6                        |
|              | All Amazon biome (37)             | 0.899 $\pm$ 0.039 | 19                    | 24                         | 24                       | 23                     | 1                        |
|              | <b>Amazon biome* (21)</b>         | 0.757 $\pm$ 0.086 | 7                     | 8                          | 8                        | 7                      | 1                        |
|              | Amazon biome (16)                 | 0.991 $\pm$ 0.025 | 15                    | 21                         | 21                       | 21                     | 0                        |
|              | All Atlantic Forest biome (3)     | 1.000 $\pm$ 0.272 | 3                     | 10                         | 10                       | 7                      | 3                        |
|              | Atlantic Forest (2)               | 1.000 $\pm$ 0.500 | 2                     | 5                          | 5                        | 4                      | 1                        |
|              | All Brazil (41)                   | 0.918 $\pm$ 0.033 | 23                    | 36                         | 36                       | 31                     | 6                        |
|              | <b>ALL (106) **</b>               | 0.951 $\pm$ 0.009 | 50                    | 125                        | 147                      | 105                    | 42                       |

H  $\pm$  SD: gene diversity  $\pm$  standard deviation. (bp): base pair. \* Sequences obtained in this study \*\*ALL: included assemblages A, B, C, D, E and F. Further details of reference strains can be found in Supplementary Table S1. Only groups with more than 1 sequence are shown.

## References

- Lebbad M, Mattsson JG, Christensson B, Ljungström B, Backhans A, Andersson JO, et al. From mouse to moose: multilocus genotyping of *Giardia* isolates from various animal species. *Vet Parasitol.* 2010;168(3-4):231-9. doi: 10.1016/j.vetpar.2009.11.003. PMID:19969422.
- Solarczyk P, Majewska AC, Moskwa B, Cabaj W, Dabert M, Nowosad P. Multilocus genotyping of *Giardia duodenalis* isolates from red deer (*Cervus elaphus*) and roe deer (*Capreolus capreolus*) from Poland. *Folia Parasitol (Praha).* 2012;59(3):237-40. doi: 10.14411/fp.2012.032 PMID: 23136805.
- Solarczyk P, Werner A, Majewska AC. Genotypowanie izolatów *Giardia duodenalis* uzyskanych od ludzi w zachodnio-centralnej Polsce [Genotype analysis of *Giardia duodenalis* isolates obtained from humans in west-central Poland]. *Wiad Parazytol.* 2010;56(2):171-7. PMID: 20707303.
- Lebbad M, Petersson I, Karlsson L, Botero-Kleiven S, Andersson JO, Svenungsson B, et al. Multilocus genotyping of human *Giardia* isolates suggests limited zoonotic transmission and association between assemblage B and flatulence in children. *PLoS Negl Trop Dis.* 2011;5(8):e1262. doi: 10.1371/journal.pntd.0001262. PMID: 21829745.
- Durigan M, Abreu AG, Zucchi MI, Franco RMB, de Souza AP. Genetic Diversity of *Giardia duodenalis*: Multilocus Genotyping Reveals Zoonotic Potential between Clinical and Environmental Sources in a Metropolitan Region of Brazil. *PLoS ONE.* 2014 9(12): e115489. doi:10.1371/journal.pone.0115489.
- Prystajec N, Tsui CK, Hsiao WW, Uyaguari-Diaz MI, Ho J, Tang P, et al. *Giardia* spp. Are Commonly Found in Mixed Assemblages in Surface Water, as Revealed by Molecular and Whole-Genome Characterization. *Appl Environ Microbiol.* 2015;81(14):4827-34. doi: 10.1128/AEM.00524-15 PMID: 25956776.
- Nunes BC, Calegar DA, Pavan MG, Jaeger LH, Monteiro KJL, Dos Reis ERC, et al. Genetic diversity of *Giardia duodenalis* circulating in three Brazilian biomes. *Infect Genet Evol.* 2018;59:107-112. doi: 10.1016/j.meegid.2018.02.001 PMID: 29410226.

8. Hassan, Z.I. Unpublished. Available in {HYPERLINK "<https://www.ncbi.nlm.nih.gov/nuccore/MN629930>" }.
9. Morrison HG, McArthur AG, Gillin FD, Aley SB, Adam RD, Olsen GJ, et al. Genomic minimalism in the early diverging intestinal parasite *Giardia lamblia*. *Science*. 2007;317(5846):1921-6. doi: 10.1126/science.114383 PMID: 17901334.
10. Teodorovic S, Braverman JM, Elmendorf HG. Unusually low levels of genetic variation among *Giardia lamblia* isolates. *Eukaryot Cell*. 2007;6(8):1421-30. doi: 10.1128/EC.00138-07. PMID: 17557879; PMCID: PMC1951139.
11. Wielinga C, Ryan U, Andrew Thompson RC, Monis P. Multi-locus analysis of *Giardia duodenalis* intra-Assemblage B substitution patterns in cloned culture isolates suggests sub-Assemblage B analyses will require multi-locus genotyping with conserved and variable genes. *Int J Parasitol*. 2011;41(5):495-503. doi: 10.1016/j.ijpara.2010.11.007 PMID: 21176781.
12. Cacciò SM, De Giacomo M, Pozio E. Sequence analysis of the beta-giardin gene and development of a polymerase chain reaction-restriction fragment length polymorphism assay to genotype *Giardia duodenalis* cysts from human faecal samples. *Int J Parasitol*. 2002;32(8):1023-30. doi: 10.1016/s0020-7519(02)00068-1 PMID: 12076631.
13. Robertson LJ, Hermansen L, Gjerde BK, Strand E, Alvsvåg JO, Langeland N. Application of genotyping during an extensive outbreak of waterborne giardiasis in Bergen, Norway, during autumn and winter 2004. *Appl Environ Microbiol*. 2006;72(3):2212-7. doi: 10.1128/AEM.72.3.2212-2217.2006 PMID: 16517674.
14. Di Giovanni GD, Betancourt WQ, Hernandez J, Assadian NW, Flores Margez JP, Lopez EJ. Investigation of potential zoonanthroponotic transmission of cryptosporidiosis and giardiasis through agricultural use of reclaimed wastewater. *Int J Environ Health Res*. 2006;16(6):405-18. doi: 10.1080/09603120601095100 PMID: 17164167.
15. Teodorovic S, Braverman JM, Elmendorf HG. Unusually low levels of genetic variation among *Giardia lamblia* isolates. *Eukaryot Cell*. 2007;6(8):1421-30. doi: 10.1128/EC.00138-07 PMID: 17557879.
16. Bonhomme J, Le Goff L, Lemée V, Gargala G, Ballet JJ, Favenec L. Limitations of tpi and bg genes sub-genotyping for characterization of human *Giardia duodenalis* isolates. *Parasitol Int*. 2011;60(3):327-30. doi: 10.1016/j.parint.2011.05.004 PMID: 21627998.
17. Kosuwin R, Putapornpip C, Pattanawong U, Jongwutiwes S. Clonal diversity in *Giardia duodenalis* isolates from Thailand: evidences for intragenic recombination and purifying selection at the beta giardin locus. *Gene*. 2010;449(1-2):1-8. doi: 10.1016/j.gene.2009.09.010 PMID: 19796671.
18. Alonso JL, Amorós I, Cuesta G. LNA probes in a real-time TaqMan PCR assay for genotyping of *Giardia duodenalis* in wastewaters. *J Appl Microbiol*. 2010;108(5):1594-601. doi: 10.1111/j.1365-2672.2009.04559.x PMID: 19840182.
19. Coronato Nunes B, Pavan MG, Jaeger LH, Monteiro KJ, Xavier SC, Monteiro FA, et al. Spatial and Molecular Epidemiology of *Giardia intestinalis* Deep in the Amazon, Brazil. *PLoS One*. 2016;11(7):e0158805. doi: 10.1371/journal.pone.0158805 PMID: 27392098.
20. Hussein AI, Tokoro M. Unpublished. Available in {HYPERLINK "<https://www.ncbi.nlm.nih.gov/nuccore/AB480877>" }.
21. Abe N, Teramoto I. Molecular evidence for person-to-person transmission of a novel subtype in *Giardia duodenalis* assemblage B at the rehabilitation institution for developmentally disabled people. *Parasitol Res*. 2012;110(2):1025-8. doi: 10.1007/s00436-011-2564-4 PMID: 21786066.
22. Tokoro M, Mizuno T, Hendarto J, Matey EJ, Songok EM, Ichimura H. Unpublished. Available in {HYPERLINK "<https://www.ncbi.nlm.nih.gov/nuccore/LC508615>" }.
23. Köster PC, Malheiros AF, Shaw JJ, Balasegaram S, Prendergast A, Lucaccioni H, et al. Multilocus Genotyping of *Giardia duodenalis* in Mostly Asymptomatic Indigenous People from the Tapirapé Tribe, Brazilian Amazon. *Pathogens*. 2021;10(2):206. <https://doi.org/10.3390/pathogens10020206>.
24. Paz e Silva FM, Monobe MM, Lopes RS, Araujo JP Jr. Molecular characterization of *Giardia duodenalis* in dogs from Brazil. *Parasitol Res*. 2012;110(1):325-34. doi: 10.1007/s00436-011-2492-3 PMID: 21695567.
25. Cacciò SM, De Giacomo M, Pozio E. Sequence analysis of the beta-giardin gene and development of a polymerase chain reaction-restriction fragment length polymorphism assay to genotype *Giardia duodenalis* cysts from human faecal samples. *Int J Parasitol*. 2002;32(8):1023-30. doi: 10.1016/s0020-7519(02)00068-1 PMID: 12076631.
26. Lalle M, Pozio E, Capelli G, Bruschi F, Crotti D, Cacciò SM. Genetic heterogeneity at the beta-giardin locus among human and animal isolates of *Giardia duodenalis* and identification of potentially zoonotic subgenotypes. *Int J Parasitol*. 2005;35(2):207-13. doi: 10.1016/j.ijpara.2004.10.022 PMID: 15710441.
